# Supplementary material
Source: Springer Nature journal article supplement (https://www.springermedizin.de/resource/supplementary/13256_2009_1116_MOESM4_ESM.pdf/9647040)

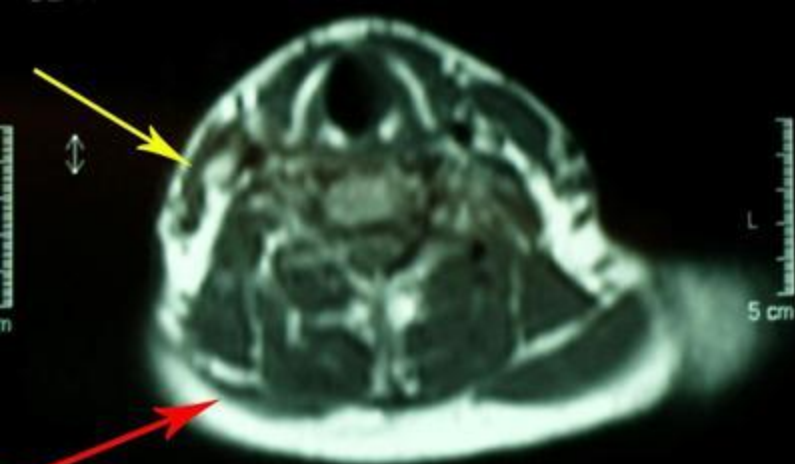

FH -135 feet

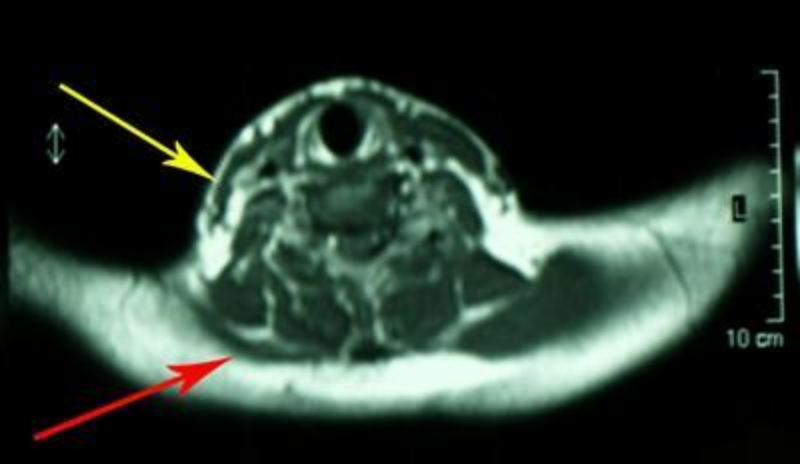

FH -143 feet

et

Sc 7  
TSE/M  
SL 14

A

Sc 7  
TSE/M  
SL 13

A

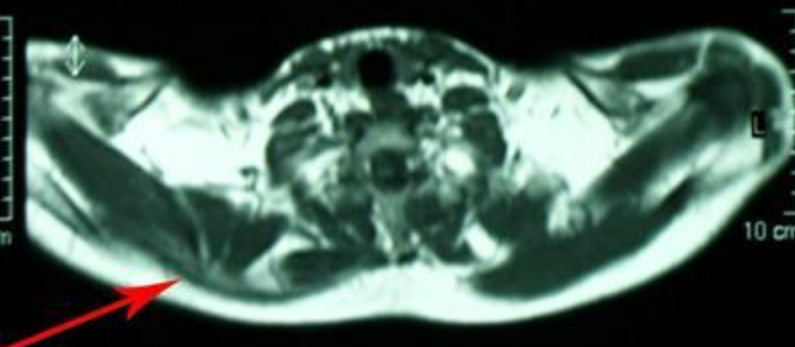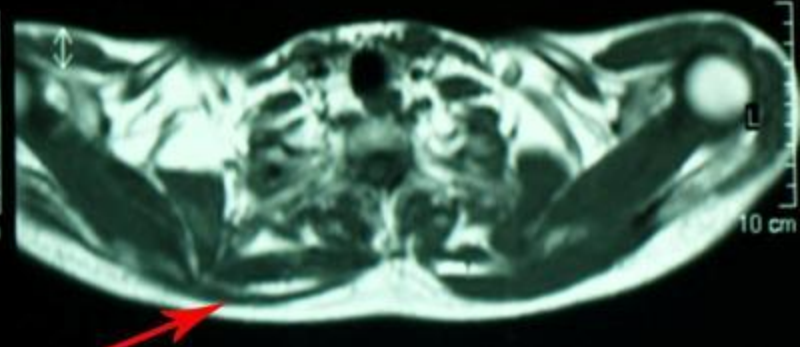

Supplement: MOESM4 [file 9647040]
